# Supplementary material for: Impacts of Nitrogen and Phosphorus Fertilization on Biomass, Polyphenol Contents, and Essential Oil Yield and Composition of Vitex negundo Linn
Source: MDPI journal article supplement (doi:10.3390/agriculture12060859), 2022-06-14
Supplement: s1 [file s1]

## Supplementary materials

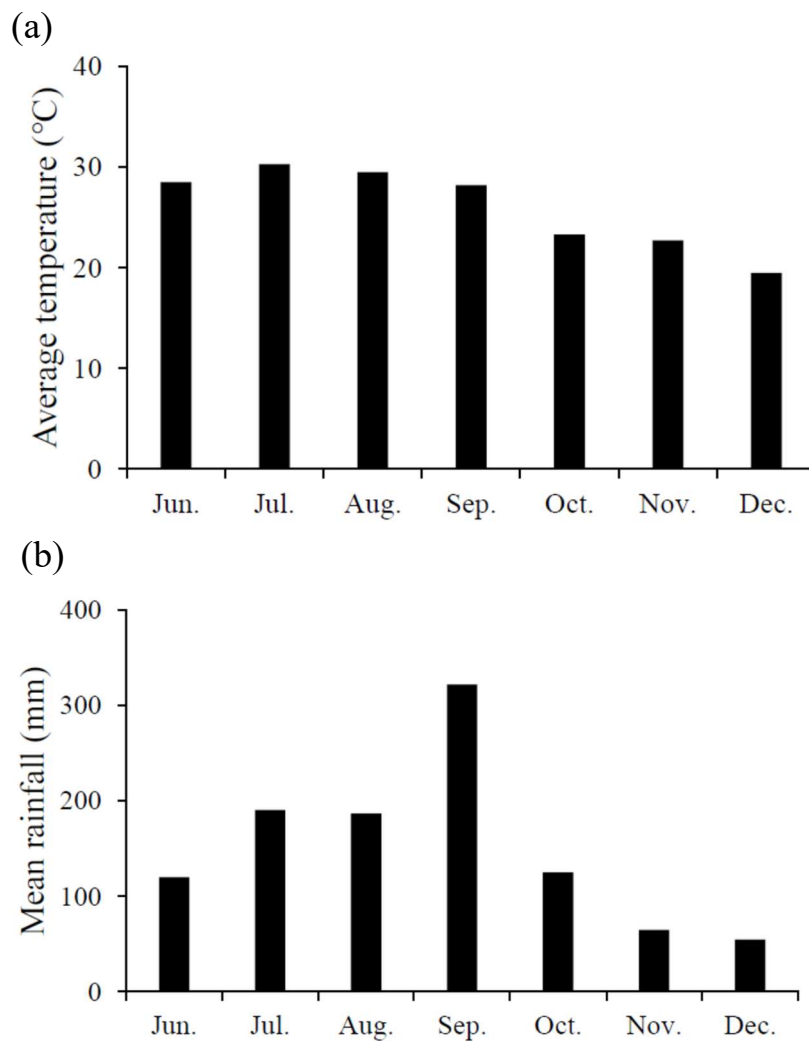

**Figure S1.** Average monthly field temperature and rainfall during the period of *V. negundo* cultivation (June 2018 to December 2018). (a) Average temperature; (b) Mean rainfall. The meteorological observation data was taken from the Central Weather Bureau of Taiwan.

**Table S1.** Design of different fertilizer treatments in field experiments

| Experiment 1: Nitrogen treatments                    | kg ha <sup>-1</sup> |                                    |                      |
|------------------------------------------------------|---------------------|------------------------------------|----------------------|
|                                                      | N                   | P (P <sub>2</sub> O <sub>5</sub> ) | K (K <sub>2</sub> O) |
| Control group (NCK)                                  | 0                   | 0                                  | 0                    |
| 50 kg-N ha <sup>-1</sup> (N5; N:P:K = 50:100:100)    |                     |                                    |                      |
| Basal fertilizer                                     | 25                  | 30                                 | 30                   |
| First top dressing                                   | 25                  | 35                                 | 35                   |
| Second top dressing                                  | 0                   | 35                                 | 35                   |
| 100 kg-N ha <sup>-1</sup> (N10; N:P:K = 100:100:100) |                     |                                    |                      |
| Basal fertilizer                                     | 30                  | 30                                 | 30                   |
| First top dressing                                   | 35                  | 35                                 | 35                   |
| Second top dressing                                  | 35                  | 35                                 | 35                   |
| 200 kg-N ha <sup>-1</sup> (N20; N:P:K = 200:100:100) |                     |                                    |                      |
| Basal fertilizer                                     | 40                  | 30                                 | 30                   |
| First top dressing                                   | 80                  | 35                                 | 35                   |
| Second top dressing                                  | 80                  | 35                                 | 35                   |

  

| Experiment 2: Phosphorous treatments                  | kg ha <sup>-1</sup> |                                    |                      |
|-------------------------------------------------------|---------------------|------------------------------------|----------------------|
|                                                       | N                   | P (P <sub>2</sub> O <sub>5</sub> ) | K (K <sub>2</sub> O) |
| Control group (PCK)                                   | 0                   | 0                                  | 0                    |
| 50 kg-P ha <sup>-1</sup> (P5; N:P:K = 100:50:100)     |                     |                                    |                      |
| Basal fertilizer                                      | 30                  | 25                                 | 30                   |
| First top dressing                                    | 35                  | 25                                 | 35                   |
| Second top dressing                                   | 35                  | 0                                  | 35                   |
| 100 kg-P ha <sup>-1</sup> (P10; N:P:K = 100:100:100)  |                     |                                    |                      |
| Basal fertilizer                                      | 30                  | 30                                 | 30                   |
| First top dressing                                    | 35                  | 35                                 | 35                   |
| Second top dressing                                   | 35                  | 35                                 | 35                   |
| 200 kg-P ha <sup>-1</sup> (P20; N:P: K = 100:200:100) |                     |                                    |                      |
| Basal fertilizer                                      | 30                  | 40                                 | 30                   |
| First top dressing                                    | 35                  | 80                                 | 35                   |
| Second top dressing                                   | 35                  | 80                                 | 35                   |
